# Supplementary material
Source: Springer Nature journal article supplement (https://www.springermedizin.de/resource/supplementary/12916_2012_630_MOESM5_ESM.pdf/9597988)

All affective disorders

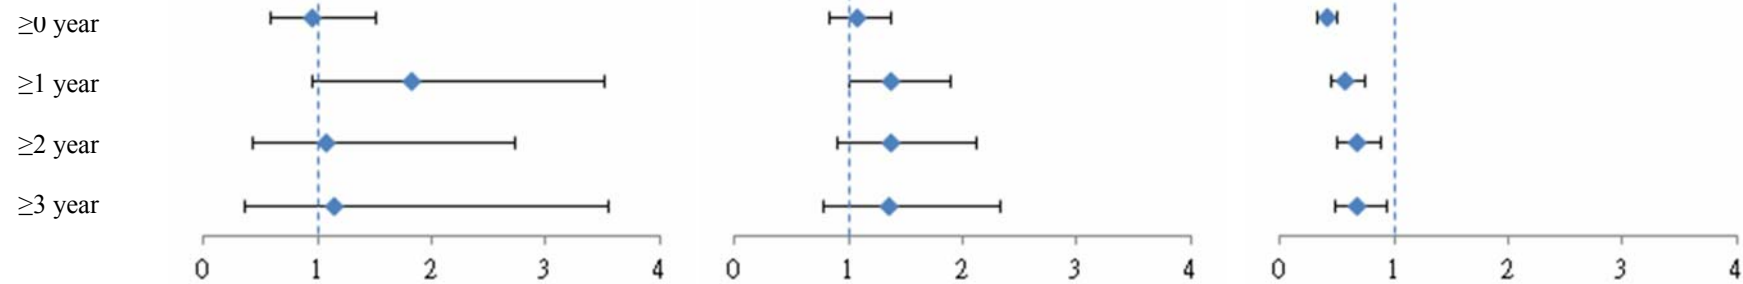

Unipolar

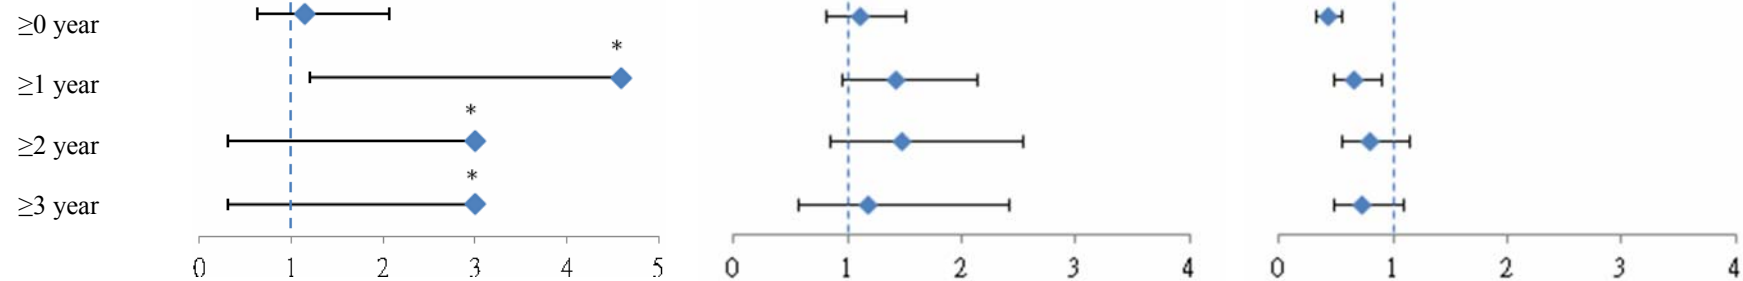

Bipolar

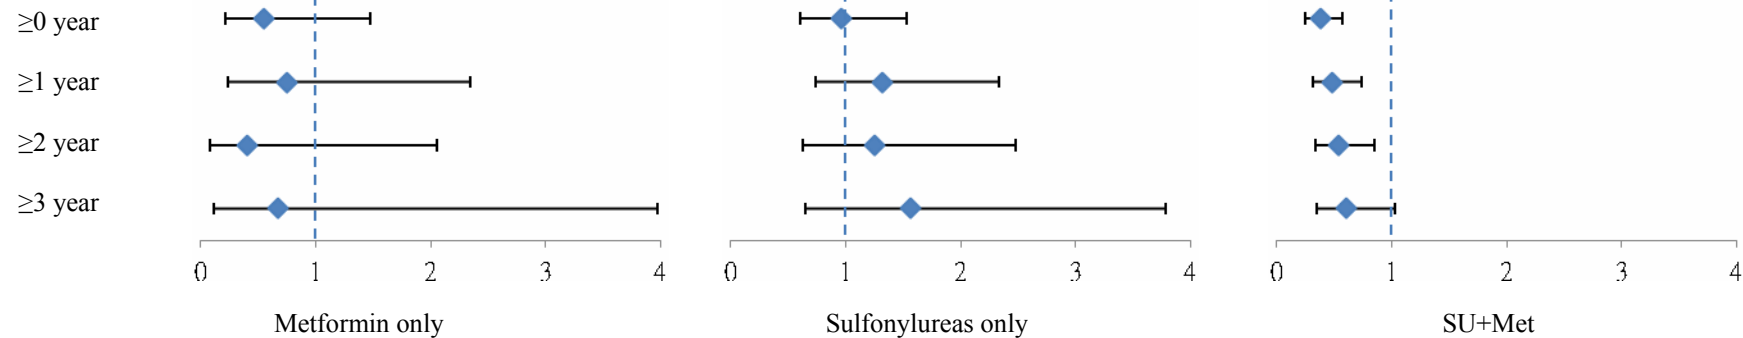

Supplement: MOESM5 [file 9597988]
